# Supplementary material for: Global and Multi-National Prevalence of Fungal Diseases—Estimate Precision
Source: PubMed Central journal article supplement (PMC5753159; doi:10.3390/jof3040057), 2017-10-18

Fungal diseases kill more than 1.5 million and affect over a billion people. However, they are still a neglected topic by public health authorities even though most deaths from fungal diseases are avoidable. Serious fungal infections occur as a consequence of other health problems including asthma, AIDS, cancer, organ transplantation and corticosteroid therapies. Early accurate diagnosis allows prompt antifungal therapy; however this is often delayed or unavailable leading to death, serious chronic illness or blindness. Recent global estimates have found 3,000,000 cases of chronic pulmonary aspergillosis, ~223,100 cases of cryptococcal meningitis complicating HIV/AIDS, ~700,000 cases of invasive candidiasis, ~500,000 cases of *Pneumocystis jirovecii* pneumonia, ~250,000 cases of invasive aspergillosis, ~100,000 cases of disseminated histoplasmosis, over 10,000,000 cases of fungal asthma and ~1,000,000 cases of fungal keratitis occur annually (**Table 1**). Since 2013, the Leading International Fungal Education (LIFE) portal has facilitated the estimation of the burden of serious fungal infections country by country for over 5.7 billion people (>80% of the world's population) (**Figure 1**). The estimates were not intended as a substitute for high quality epidemiological study or comprehensive surveillance, but do provide a rough approximation of the size of each fungal disease by country and therefore a means of comparing countries. The diagnostic gap between estimated burden and recorded cases numbers provides a clear cut target to close, to improve patient outcomes. The recognition of fungal infections as a major contributor to mortality of several conditions emphasizes the need for public health efforts in reducing the incidence and mortality of these infectious diseases.

| Fungal Disease                          | Annual Incidence               | Global Burden  |
|-----------------------------------------|--------------------------------|----------------|
| <b>Superficial</b>                      |                                |                |
| Skin, hair, nail                        |                                | ~1,000,000,000 |
| Fungal keratitis                        |                                | ~1,000,000     |
| <b>Mucosal</b>                          |                                |                |
| Oral candidiasis                        | ~2,000,000                     |                |
| Oesophageal candidiasis                 | ~1,300,000                     |                |
| Vulvovaginal candidiasis episode        | 70% affected in their lifetime |                |
| Recurrent vulvovaginal candidiasis      |                                | ~134,000,000   |
| <b>Allergic</b>                         |                                |                |
| ABPA in asthma                          |                                | ~4,800,000     |
| ABPA in cystic fibrosis                 |                                | ~6,675         |
| Severe asthma with fungal sensitisation |                                | ~6,500,000     |
| Fungal rhinosinusitis                   |                                | ~12,000,000    |
| <b>Chronic severe</b>                   |                                |                |
| Chronic pulmonary aspergillosis         |                                | ~3,000,000     |
| Mycetoma                                |                                | ~9,000         |
| Chromoblastomycosis                     |                                | >10,000        |
| Coccidioidomycosis                      |                                | ~25,000        |
| Paracoccidioidomycosis                  |                                | ~4,000         |
| Blastomycosis                           |                                | ~3,000         |
| Histoplasma infection                   | ~500,000                       | ~25,000        |
| Sporotrichosis                          | >40,000                        |                |
| <b>Acute invasive</b>                   |                                |                |
| Invasive candidiasis                    | ~750,000                       |                |
| Invasive aspergillosis                  | >300,000                       |                |
| PCP in AIDS and non-AIDS                | ~500,000                       |                |
| Cryptococcosis in AIDS                  | ~223,000                       |                |
| Mucormycosis                            | >10,000                        |                |
| Disseminated histoplasmosis             | ~100,000                       |                |
| Talaromycosis                           | ~8,000                         |                |

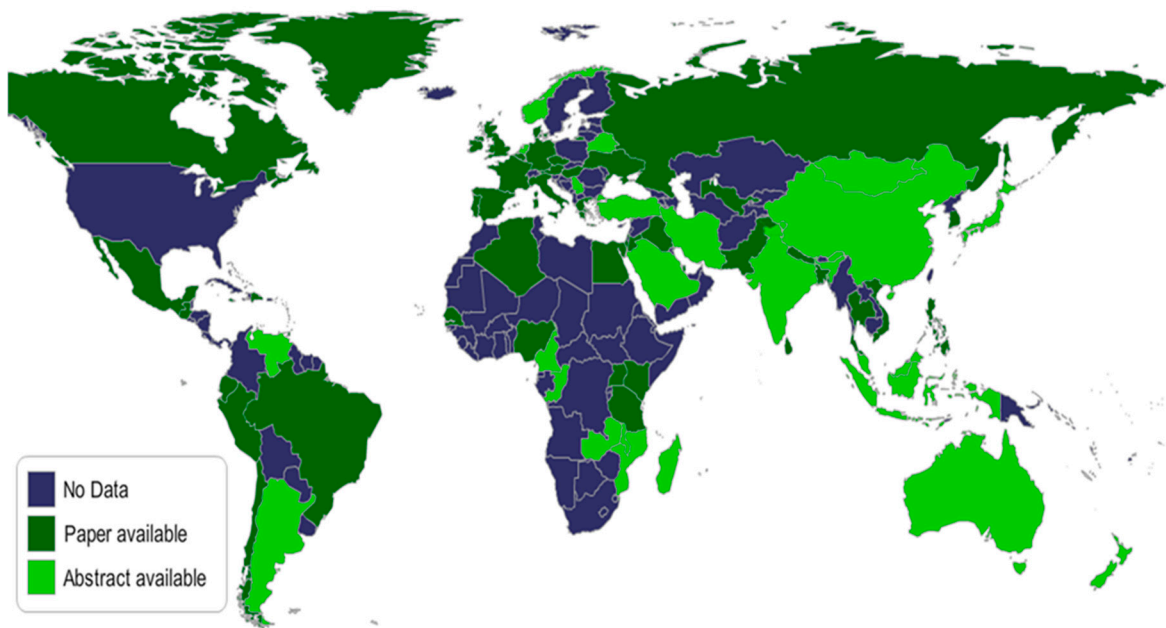

Supplement: jof-03-00057-s001.pdf [file jof-03-00057-s001.pdf]
